# Supplementary material
Source: PubMed Central journal article supplement (PMC8579976)
Supplement: aem.01855-21-s0001.pdf [file aem.01855-21-s0001.pdf]

**Overexpression of an oxidoreductase YghA confers tolerance against furfural in ethanologenic *Escherichia coli* strain SSK42**

**TABLE S1: List of plasmids and strains used in the study.**

**TABLE S2: Percent COV observed in first screen of *E. coli* BW25113 mutant strains at 3h and 6h of cultivation.**

**TABLE S3: The maximum specific ethanol productivity values of SSK42 (pTrcHisA) and SSK42 (pTrcHisA-*yghA*) strains at 5% and 10% xylose concentration**

**Figure S1: LD<sub>50</sub> values of parent *E. coli* BW25113 strain towards furfural in media containing 0.2% (wt/vol) of either glucose (A) or xylose (B) as sole carbon source.**

**Figure S2: First screening of *E. coli* BW25113 derived mutant strains. Cultivation was performed in media containing 0.2% (wt/vol) xylose and 0.25 g L<sup>-1</sup> furfural.**

**Figure S3: Second screening of selected *E. coli* BW25113 mutant strains in AM1 media containing 5% (wt/vol) xylose and 1 g L<sup>-1</sup> furfural.**

**Figure S4: Transformation of *yghA* gene in *E. coli* BW25113Δ*yghA* genetic background.**

**Figure S5: Influence of carbon source in promoting biomass formation in *E. coli* SSK42 host with either pTrcHisA (dark gery) or with pTrcHisA-*yghA* (light grey).**

**Figure S6: Overexpression of YghA also leads to metabolism of 1 g L<sup>-1</sup> 5-HMF from media containing 5% (wt/vol) xylose and 0.1 mM IPTG.**

**Figure S7: Influence of IPTG concentration on furfural metabolism in SSK42 harboring either pTrcHisA (dark grey) or pTrcHisA-*yghA* (light grey).**

**Figure S8: Furfural concentration in bioreactor containing 5% xylose (wt/vol) and 1 g L<sup>-1</sup> furfural.**

**TABLE S1. List of plasmids and strains used in the study**

| Plasmid/Strain          | Description                                                                                                                                          | Source/Reference                                                                                              |
|-------------------------|------------------------------------------------------------------------------------------------------------------------------------------------------|---------------------------------------------------------------------------------------------------------------|
| <b>Plasmid</b>          |                                                                                                                                                      |                                                                                                               |
| pTrcHisA                | P <sub>trc</sub> bla oriR rrnB lacI <sup>q</sup> 6XHis                                                                                               | Invitrogen                                                                                                    |
| pTrcHisA-yghA           | yghA ORF cloned into pTrcHisA                                                                                                                        | This study                                                                                                    |
| pCP20                   | bla, flp, temperature-conditional replicon                                                                                                           | CGSC #7629                                                                                                    |
| <b>Strain</b>           |                                                                                                                                                      |                                                                                                               |
| SSK42                   | <i>E. coli</i> B P <sub>gapA</sub> PDH $\Delta$ ldh $\Delta$ frdA $\Delta$ pflB undergone evolutionary adaptation.                                   | Jilani SB, Venigalla SSK, Mattam AJ, Dev C, Yazdani SS. <i>J Ind Microbiol Biotechnol</i> 44:1375–1384 (2017) |
| BW25113 (pTrcHisA)      | BW25113, $\Delta$ yghA :: FRT-kan-FRT - pTrcHisA                                                                                                     | This study                                                                                                    |
| BW25113 (pTrcHisA-yghA) | BW25113, $\Delta$ yghA :: FRT-kan-FRT - pTrcHisA-yghA                                                                                                | This study                                                                                                    |
| SSK42 (pTrcHisA)        | SSK42 harboring pTrcHisA                                                                                                                             | This study                                                                                                    |
| SSK42 (pTrcHisA-yghA)   | SSK42 harboring pTrcHisA-yghA                                                                                                                        | This study                                                                                                    |
| BW25113                 | F <sub>-</sub> , DE( <i>araD-araB</i> )567, <i>lacZ</i> 4787(del):: <i>rrnB</i> _3, LAM-, <i>rph</i> _1, DE( <i>rhaD-rhaB</i> ) 568, <i>hsdR</i> 514 | CGSC#7636                                                                                                     |
| $\Delta$ adhP           | BW25113, $\Delta$ adhP :: FRT-kan-FRT                                                                                                                | CGSC#9282                                                                                                     |
| $\Delta$ aldB           | BW25113, $\Delta$ aldB :: FRT-kan-FRT                                                                                                                | CGSC#10626                                                                                                    |
| $\Delta$ aldA           | BW25113, $\Delta$ aldA :: FRT-kan-FRT                                                                                                                | CGSC#9239                                                                                                     |
| $\Delta$ astD           | BW25113, $\Delta$ astD :: FRT-kan-FRT                                                                                                                | CGSC#11289                                                                                                    |
| $\Delta$ betB           | BW25113, $\Delta$ betB :: FRT-kan-FRT                                                                                                                | CGSC#8504                                                                                                     |
| $\Delta$ dkgA           | BW25113, $\Delta$ dkgA :: FRT-kan-FRT                                                                                                                | CGSC#11427                                                                                                    |
| $\Delta$ dkgB           | BW25113, $\Delta$ dkgB :: FRT-kan-FRT                                                                                                                | CGSC#12026                                                                                                    |
| $\Delta$ eutG           | BW25113, $\Delta$ eutG :: FRT-kan-FRT                                                                                                                | CGSC#9943                                                                                                     |
| $\Delta$ feaB           | BW25113, $\Delta$ feaB :: FRT-kan-FRT                                                                                                                | CGSC#9220                                                                                                     |
| $\Delta$ frmA           | BW25113, $\Delta$ frmA :: FRT-kan-FRT                                                                                                                | CGSC#8536                                                                                                     |
| $\Delta$ fucO           | BW25113, $\Delta$ fucO :: FRT-kan-FRT                                                                                                                | CGSC#11871                                                                                                    |
| $\Delta$ gabD           | BW25113, $\Delta$ gabD :: FRT-kan-FRT                                                                                                                | CGSC#10077                                                                                                    |
| $\Delta$ gldA           | BW25113, $\Delta$ gldA :: FRT-kan-FRT                                                                                                                | CGSC#11940                                                                                                    |
| $\Delta$ hdhA           | BW25113, $\Delta$ hdhA :: FRT-kan-FRT                                                                                                                | CGSC#9372                                                                                                     |
| $\Delta$ maoC           | BW25113, $\Delta$ maoC :: FRT-kan-FRT                                                                                                                | CGSC#9222                                                                                                     |
| $\Delta$ mhpF           | BW25113, $\Delta$ mhpF :: FRT-kan-FRT                                                                                                                | CGSC#8532                                                                                                     |
| $\Delta$ pgi            | BW25113, $\Delta$ pgi :: FRT-kan-FRT                                                                                                                 | CGSC#10867                                                                                                    |
| $\Delta$ prr            | BW25113, $\Delta$ prr :: FRT-kan-FRT                                                                                                                 | CGSC#9259                                                                                                     |
| $\Delta$ puuC           | BW25113, $\Delta$ puuC :: FRT-kan-FRT                                                                                                                | CGSC#11640                                                                                                    |
| $\Delta$ rspB           | BW25113, $\Delta$ rspB :: FRT-kan-FRT                                                                                                                | CGSC#9342                                                                                                     |
| $\Delta$ sad            | BW25113, $\Delta$ sad :: FRT-kan-FRT                                                                                                                 | CGSC#11267                                                                                                    |

|              |                                      |            |
|--------------|--------------------------------------|------------|
| <i>Δtas</i>  | BW25113, <i>Δtas</i> :: FRT-kan-FRT  | CGSC#10189 |
| <i>Δusg</i>  | BW25113, <i>Δusg</i> :: FRT-kan-FRT  | CGSC#9858  |
| <i>ΔucpA</i> | BW25113, <i>ΔucpA</i> :: FRT-kan-FRT | CGSC#11361 |
| <i>ΔyahK</i> | BW25113, <i>ΔyahK</i> :: FRT-kan-FRT | CGSC#8516  |
| <i>ΔyajO</i> | BW25113, <i>ΔyajO</i> :: FRT-kan-FRT | CGSC#8578  |
| <i>ΔyagR</i> | BW25113, <i>ΔyagR</i> :: FRT-kan-FRT | CGSC#8491  |
| <i>ΔyagS</i> | BW25113, <i>ΔyagS</i> :: FRT-kan-FRT | CGSC#8492  |
| <i>ΔybdR</i> | BW25113, <i>ΔybdR</i> :: FRT-kan-FRT | CGSC#8716  |
| <i>ΔycjQ</i> | BW25113, <i>ΔycjQ</i> :: FRT-kan-FRT | CGSC#9171  |
| <i>ΔycjS</i> | BW25113, <i>ΔycjS</i> :: FRT-kan-FRT | CGSC#9172  |
| <i>ΔyciK</i> | BW25113, <i>ΔyciK</i> :: FRT-kan-FRT | CGSC#9138  |
| <i>ΔydfG</i> | BW25113, <i>ΔydfG</i> :: FRT-kan-FRT | CGSC#9318  |
| <i>ΔydhE</i> | BW25113, <i>ΔydhE</i> :: FRT-kan-FRT | CGSC#9408  |
| <i>ΔydjL</i> | BW25113, <i>ΔydjL</i> :: FRT-kan-FRT | CGSC#9483  |
| <i>ΔyeaE</i> | BW25113, <i>ΔyeaE</i> :: FRT-kan-FRT | CGSC#9486  |
| <i>ΔygbJ</i> | BW25113, <i>ΔygbJ</i> :: FRT-kan-FRT | CGSC#10129 |
| <i>ΔygfF</i> | BW25113, <i>ΔygfF</i> :: FRT-kan-FRT | CGSC#10226 |
| <i>ΔyghA</i> | BW25113, <i>ΔyghA</i> :: FRT-kan-FRT | CGSC#10283 |
| <i>ΔyghZ</i> | BW25113, <i>ΔyghZ</i> :: FRT-kan-FRT | CGSC#10282 |
| <i>ΔyggP</i> | BW25113, <i>ΔyggP</i> :: FRT-kan-FRT | CGSC#11416 |
| <i>ΔygiB</i> | BW25113, <i>ΔygiB</i> :: FRT-kan-FRT | CGSC#11658 |
| <i>ΔygjR</i> | BW25113, <i>ΔygjR</i> :: FRT-kan-FRT | CGSC#10334 |
| <i>ΔyhdH</i> | BW25113, <i>ΔyhdH</i> :: FRT-kan-FRT | CGSC#10438 |
| <i>ΔyhhX</i> | BW25113, <i>ΔyhhX</i> :: FRT-kan-FRT | CGSC#10532 |
| <i>ΔyhiN</i> | BW25113, <i>ΔyhiN</i> :: FRT-kan-FRT | CGSC#10562 |
| <i>ΔyiaY</i> | BW25113, <i>ΔyiaY</i> :: FRT-kan-FRT | CGSC#11499 |
| <i>ΔyihU</i> | BW25113, <i>ΔyihU</i> :: FRT-kan-FRT | CGSC#10784 |
| <i>ΔyjbB</i> | BW25113, <i>ΔyjbB</i> :: FRT-kan-FRT | CGSC#11992 |
| <i>ΔykgE</i> | BW25113, <i>ΔykgE</i> :: FRT-kan-FRT | CGSC#11999 |
| <i>ΔyohF</i> | BW25113, <i>ΔyohF</i> :: FRT-kan-FRT | CGSC#9723  |
| <i>ΔyphC</i> | BW25113, <i>ΔyphC</i> :: FRT-kan-FRT | CGSC#12007 |
| <i>ΔyqhD</i> | BW25113, <i>ΔyqhD</i> :: FRT-kan-FRT | CGSC#10288 |

**TABLE S2: Percent Coefficient of Variation (COV) observed in first screen of *E. coli* BW25113 mutant strains at 3 and 6 h of cultivation.\***

|                    | 3h       | 6h       |
|--------------------|----------|----------|
| <b>WT</b>          |          |          |
| <b>BW25113</b>     | <b>0</b> | <b>4</b> |
| <i>viaY</i>        | 7        | 27       |
| <i>yjgB</i>        | 1        | 6        |
| <i>feaB</i>        | 13       | 35       |
| <i>eutG</i>        | 3        | 7        |
| <i>ybdR</i>        | 12       | 71       |
| <i>ycjQ</i>        | 8        | 47       |
| <b><i>ycjS</i></b> | <b>3</b> | <b>4</b> |
| <i>rspB</i>        | 3        | 35       |
| <i>ygfF</i>        | 4        | 7        |
| <i>ucpA</i>        | 6        | 14       |
| <i>ydjL</i>        | 3        | 20       |
| <i>pgi</i>         | 12       | 13       |
| <i>yghZ</i>        | 14       | 8        |
| <i>ydfG</i>        | 3        | 7        |
| <i>ygiB</i>        | 1        | 14       |
| <i>hdhA</i>        | 3        | 6        |
| <i>ygjR</i>        | 5        | 15       |
| <i>ykgE</i>        | 4        | 18       |
| <i>yhdH</i>        | 4        | 8        |
| <b><i>yhhX</i></b> | <b>5</b> | <b>5</b> |
| <i>ydhE</i>        | 7        | 16       |
| <i>tas</i>         | 3        | 7        |
| <i>yeaE</i>        | 1        | 10       |
| <i>aldB</i>        | 2        | 7        |
| <i>maoC</i>        | 8        | 27       |
| <i>yagR</i>        | 2        | 15       |
| <i>gabD</i>        | 1        | 13       |
| <i>prp</i>         | 6        | 21       |
| <i>yagS</i>        | 5        | 26       |
| <i>dkgB</i>        | 3        | 19       |
| <i>dkgA</i>        | 7        | 15       |
| <b><i>betB</i></b> | <b>1</b> | <b>3</b> |
| <i>sad</i>         | 8        | 25       |
| <i>yhiN</i>        | 6        | 15       |
| <b><i>yphC</i></b> | <b>0</b> | <b>0</b> |
| <i>yajO</i>        | 6        | 12       |

|                    |          |          |
|--------------------|----------|----------|
| <i>frmA</i>        | 1        | 13       |
| <i>yahK</i>        | 1        | 15       |
| <i>yciK</i>        | 0        | 6        |
| <i>yqhD</i>        | 6        | 29       |
| <i>mhpF</i>        | 0        | 9        |
| <i>adhP</i>        | 9        | 26       |
| <i>aldA</i>        | 5        | 10       |
| <i>fucO</i>        | 8        | 9        |
| <i>yggP</i>        | 12       | 26       |
| <i>ycjS</i>        | 4        | 17       |
| <i>ygbJ</i>        | 2        | 9        |
| <i>yohF</i>        | 4        | 25       |
| <i>usg</i>         | 2        | 10       |
| <i>gldA</i>        | 4        | 14       |
| <i>yihU</i>        | 3        | 14       |
| <i>astD</i>        | 4        | 39       |
| <i>puuC</i>        | 5        | 10       |
| <b><i>yghA</i></b> | <b>3</b> | <b>5</b> |

\*Strains having COV equal to or less than 5 at both 3 h and 6 h time points were considered for further experiment and have been highlighted in green.

**TABLE S3: The maximum specific ethanol productivity values of SSK42 (pTrcHisA) and SSK42 (pTrcHisA-yghA) strains at 5% and 10% xylose concentration**

| Strain                            | Furfural Conc<br>(g L <sup>-1</sup> ) | 5% xylose                                                          |                    | 10% xylose                                                         |                    |
|-----------------------------------|---------------------------------------|--------------------------------------------------------------------|--------------------|--------------------------------------------------------------------|--------------------|
|                                   |                                       | Sp ethanol<br>productivity<br>(g g <sup>-1</sup> h <sup>-1</sup> ) | Time period<br>(h) | Sp ethanol<br>productivity<br>(g g <sup>-1</sup> h <sup>-1</sup> ) | Time period<br>(h) |
| SSK42<br>(pTrcHisA)               | 0                                     | 0.56                                                               | 0-24               | 0.51                                                               | 0-24               |
| SSK42<br>(pTrcHisA- <i>yghA</i> ) | 0                                     | 0.41                                                               | 0-24               | 0.51                                                               | 0-24               |
| SSK42<br>(pTrcHisA)               | 1                                     | 0.35                                                               | 72-96              | 0.34                                                               | 96-120             |
| SSK42<br>(pTrcHisA- <i>yghA</i> ) | 1                                     | 0.4                                                                | 24-48              | 0.39                                                               | 48-72              |

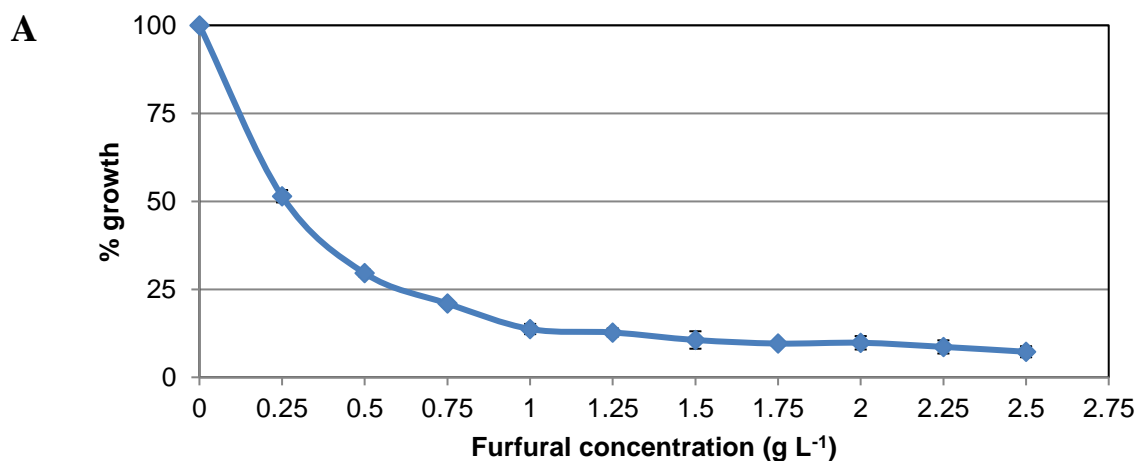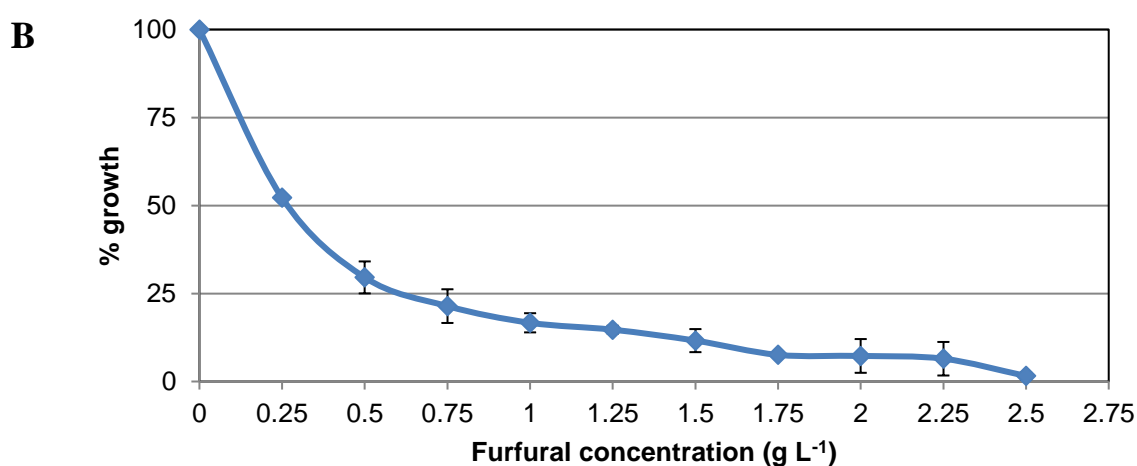

**Figure S1: LD<sub>50</sub> values of parent *E. coli* BW25113 strain towards furfural in media containing 0.2% (wt/vol) of either glucose (A) or xylose (B) as sole carbon source. The observations were recorded at 3 h and LD<sub>50</sub> values of the BW25113 strain against furfural for either carbon source was determined to be 0.25 g L<sup>-1</sup>. Values are average of n=2 independent experiments. Error bars represent SD of the mean.**

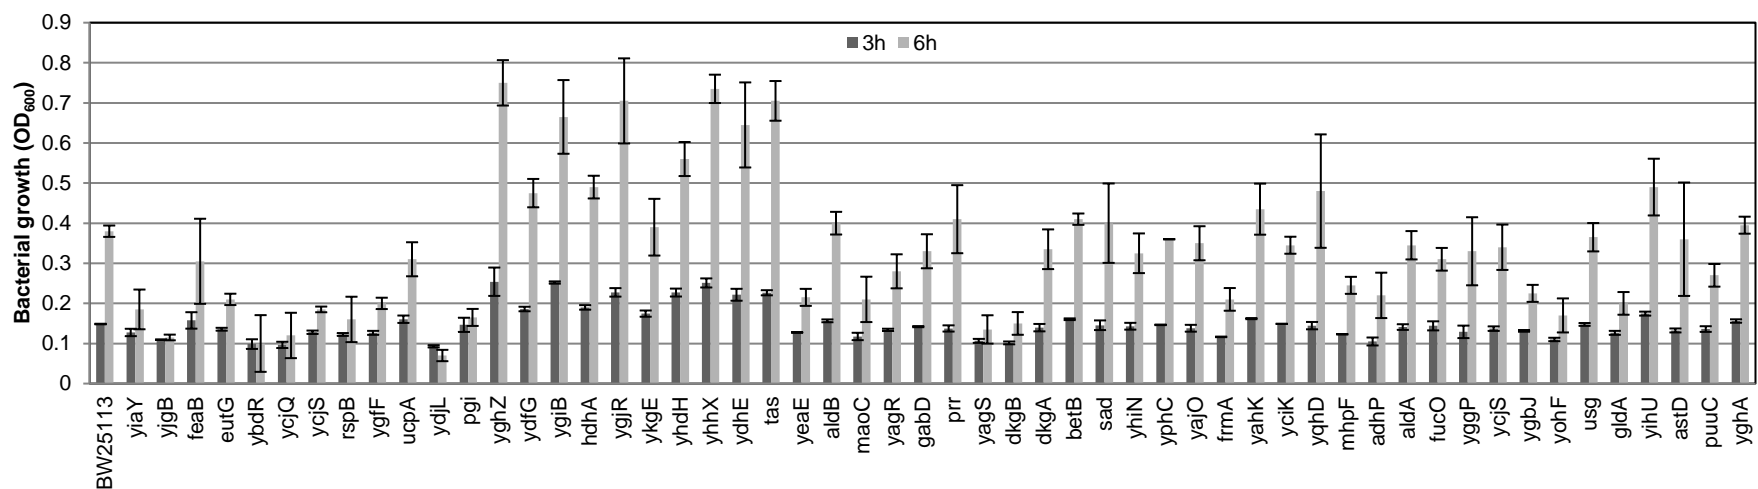

**Figure S2: First screening of *E. coli* BW25113 derived mutant strains. Cultivation was performed in media containing 0.2% (wt/vol) xylose and 0.25 g L<sup>-1</sup> furfural. Cultures were seeded at OD<sub>600</sub>=0.1 and observations recorded at 3 h and 6 h. Values are average of at least n=2 independent experiments. Error bars represent SD of the mean.**



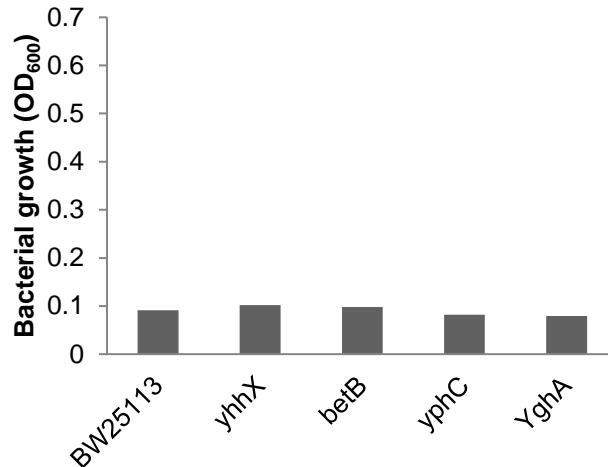

**Figure S3: Second screening of selected *E. coli* BW25113 mutant strains in AM1 media containing 5% (wt/vol) xylose and 1 g L<sup>-1</sup> furfural.** Cultures were seeded at OD<sub>600</sub>=0.1 and growth recorded at 48 h. Values represent outcome of one observation.

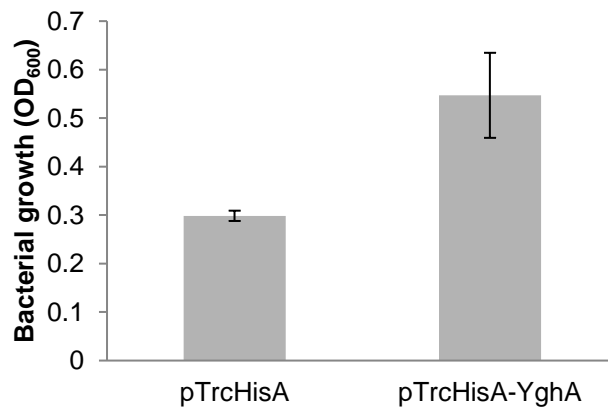

**Figure S4: Transformation of *yghA* gene in *E. coli* BW25113Δ*yghA* genetic background.** Strain harbored either empty plasmid as a control (pTrcHisA) or cloned *yghA* gene (pTrcHisA-*yghA*). Cultures were grown in media containing 5% (wt/vol) xylose and 0.5 g L<sup>-1</sup> furfural. OD<sub>600</sub> was recorded at 24 h. Values are average of n=2 independent experiments. Error bars represent SD of the mean.

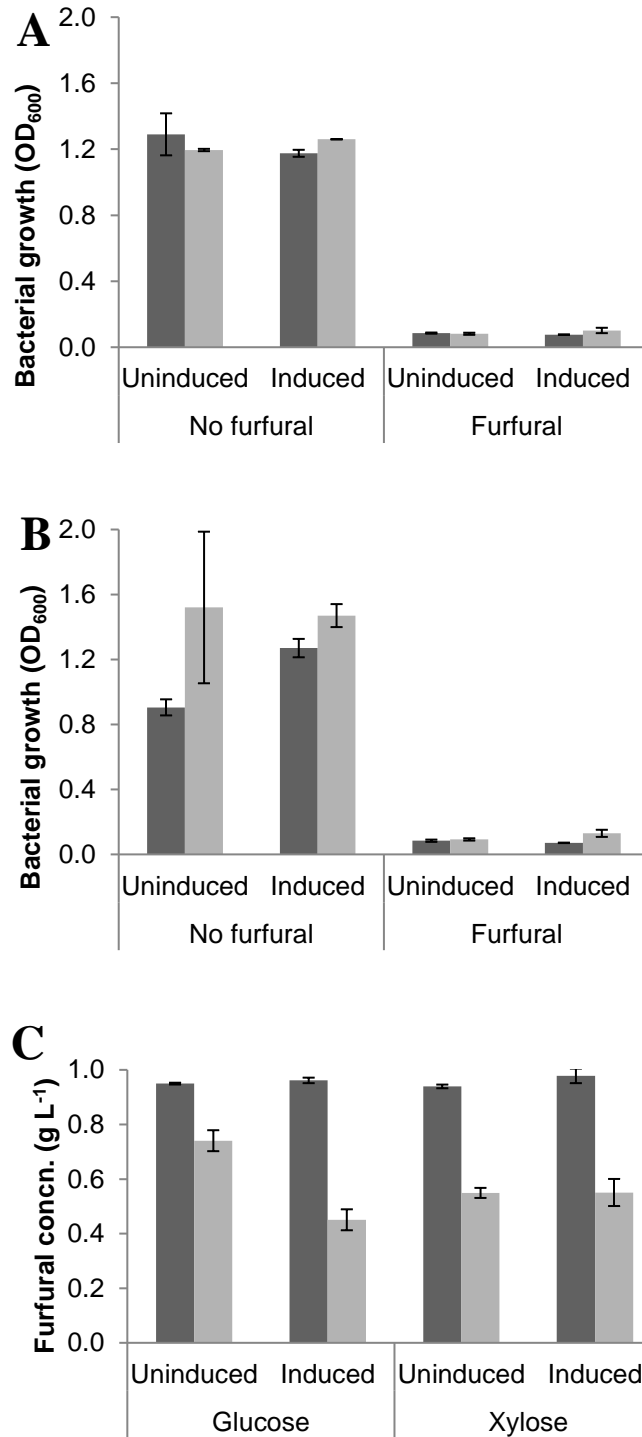

**Figure S5: Influence of carbon source in promoting biomass formation in *E. coli* SSK42 host with either pTrcHisA (dark grey) or with pTrcHisA-yghA (light grey).** Media consisted of 1 g L<sup>-1</sup> furfural, 0.1 mM IPTG and either 5% (wt/vol) glucose (A) or xylose (B) as carbon source. OD<sub>600</sub> was recorded at 48 h. (C) Furfural concentration was measured at 48 h of cultivation. Values are average of n=2 independent experiments. Error bars represent SD of the mean.

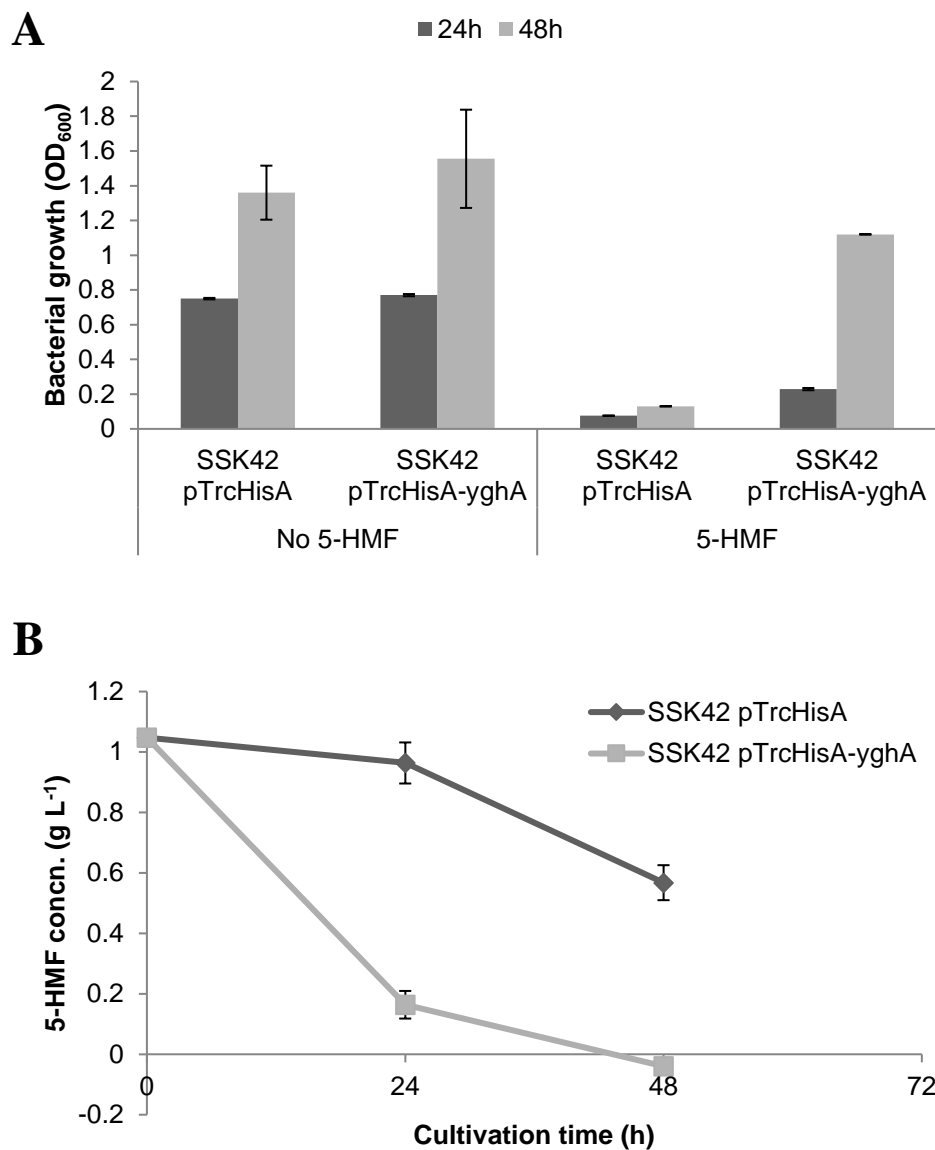

**Figure S6: Overexpression of YghA also leads to metabolism of 1 g L<sup>-1</sup> 5-HMF from media containing 5% (wt/vol) xylose and 0.1 mM IPTG. OD<sub>600</sub> (A) and concentration of 5-HMF (B) was recorded at 24 h and 48 h. Values are average of n=2 independent experiments. Error bars represent SD of the mean.**

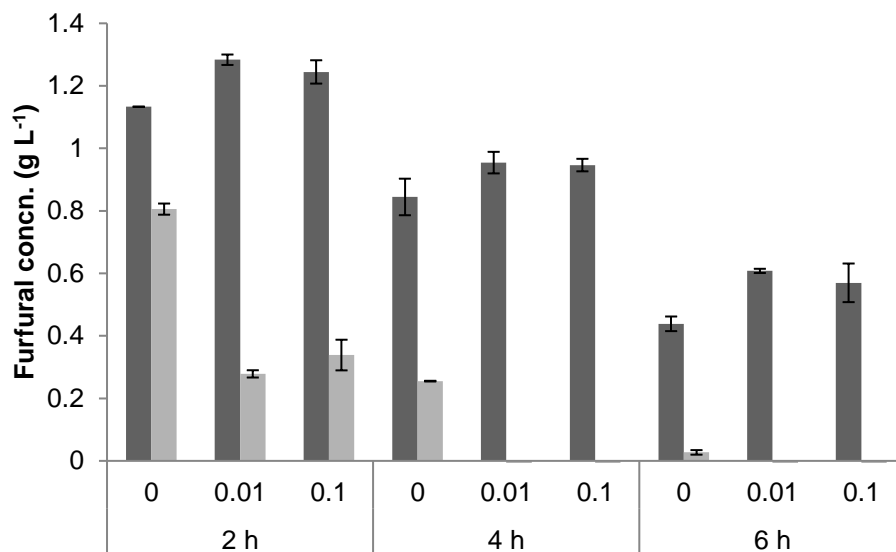

**Figure S7: Influence of IPTG concentration on furfural metabolism in SSK42 harboring either pTrcHisA (dark grey) or pTrcHisA-*yghA* (light grey).** Strains were seeded at OD<sub>600</sub> of 2.0 in media containing 5% (wt/vol) xylose and 2.0 g L<sup>-1</sup> furfural. Concentration of IPTG used was 0, 0.01 and 0.1 mM. Concentration of furfural was measured at 2, 4 and 6 h of growth. Values are average of n=2 independent experiments. Error bars represent SD of the mean.

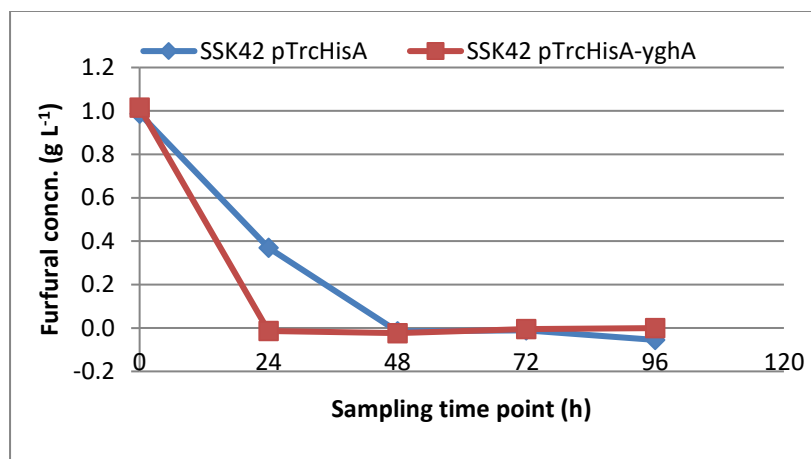

**Figure S8: Furfural concentration in bioreactor containing 5% xylose (wt/vol) and 1 g L<sup>-1</sup> furfural.** Samples were analyzed immediately after extraction at indicated time points. Values represent outcome of one experimental observation.
